# Supplementary figures and images for: Understanding the effect of fire on vegetation composition and gross primary production in a semi-arid shrubland ecosystem using the Ecosystem Demography (EDv2.2) model
Source: Copernicus journal article supplement (doi:10.5194/bg-2019-510), 2020-02-04

**Figure S1.** Correlation between modelled GPP output and Landsat-derived NDVI

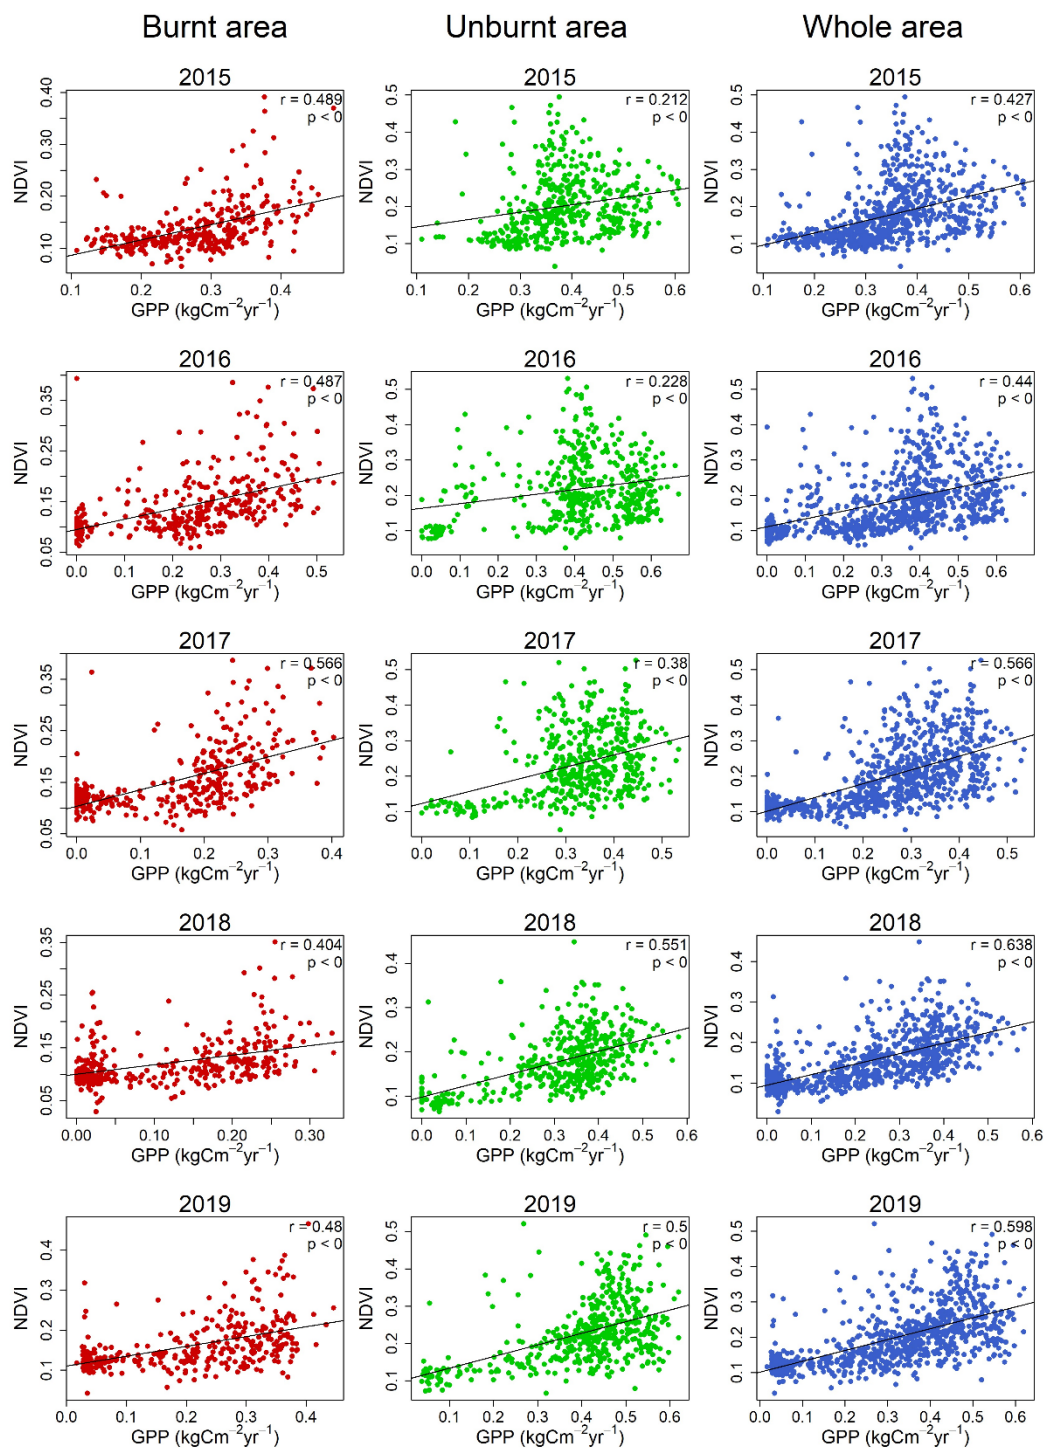

Supplement: Supplementary file 1 [file bg-2019-510-supplement.pdf]
